# Supplementary material for: Age-Specific Effects of Visual Feature Binding
Source: MDPI journal article supplement (doi:10.3390/brainsci13101389), 2023-09-29
Supplement: s1 [file s1]

## Supplement: Overview

| Content                                            | Number      |
|----------------------------------------------------|-------------|
| Neuropsychological Test Scores in old participants | Table S1    |
| Grand-averages: ERP responses to test arrays       | Figure S1   |
| Peak analysis: P1 and N2                           | Analysis S1 |
| Effects of the factors block                       | Analysis S2 |
| Statistical analysis of hit rate and false alarms  | Table S2    |
| Comparison of studies: Age-specific binding effect | Table S3    |

## Supplement: Table S1

Neuropsychological Test Scores: Comparison of the non-standardized test values

| Test                       | OLD             | YOUNG          | t-Test    |
|----------------------------|-----------------|----------------|-----------|
| Trail-Making-Test<br>(A)   | 35.3 s (2.16)   | 24.5 s (1.44)  | -4.24 *** |
| Trail-Making-Test<br>(B)   | 81.30 s (30.52) | 51.3 s (17.53) | -4.21 *** |
| Block Span<br>(forward)    | 7.56 (1.68)     | 9.73 (1.89)    | 4.11 ***  |
| Block Span<br>(backward)   | 8.00 (1.57)     | 9.54 (1.50)    | 3.46 ***  |
| IDG: visual<br>learning    | 5.00 (2.37)     | 8.92 (1.23)    | 7.36 ***  |
| IGD: visual<br>recognition | 7.32 (1.49)     | 9.77 (0.51)    | 7.85 ***  |

|                            |              |              |          |
|----------------------------|--------------|--------------|----------|
| IGD: visual<br>association | 4.82 (2.04)  | 6.92 (0.39)  | 5.16 *** |
| LPS: reasoning             | 19.45 (5.74) | 31.96 (4.07) | 8.80 *** |
| LPS: visual filtering      | 21.91 (5.30) | 29.19 (3.90) | 5.48 *** |

\*\*\*  $p < 0.001$ , \*\*  $p < 0.01$ , \*  $p < 0.05$

IGD (Inventar zur Gedächtnisdiagnostik, Baller, Brand, Kalbe & Kessler, 2006, Hogrefe Testzentrale) LPS (Leistungsprüfsystem, Horn, 1983, Hogrefe Testzentrale)

Supplement: Figure S1

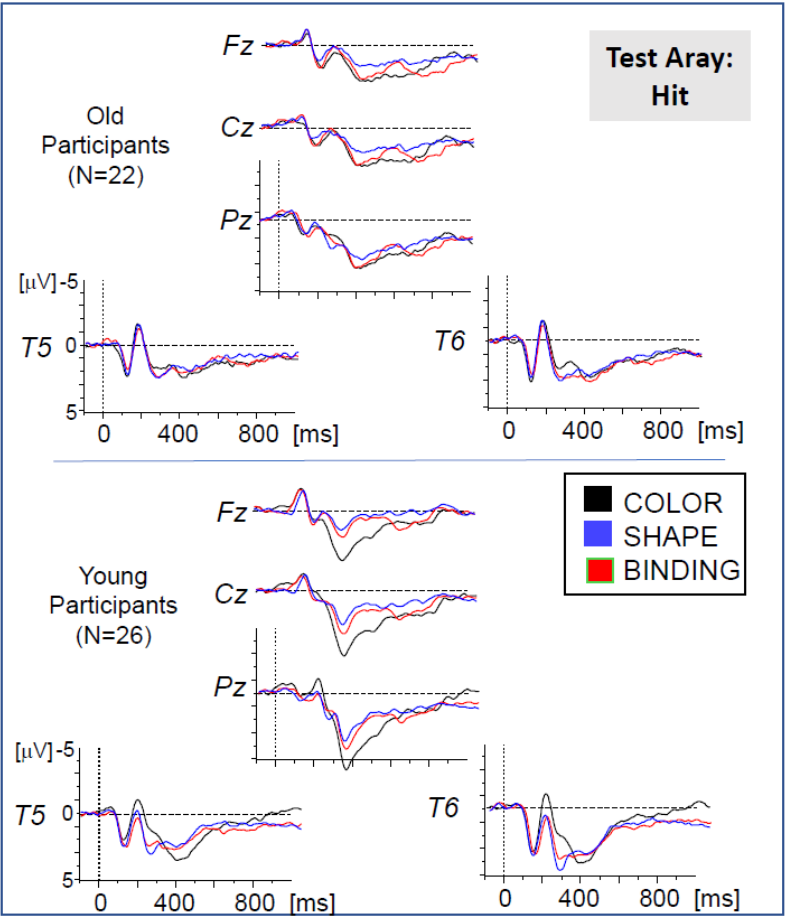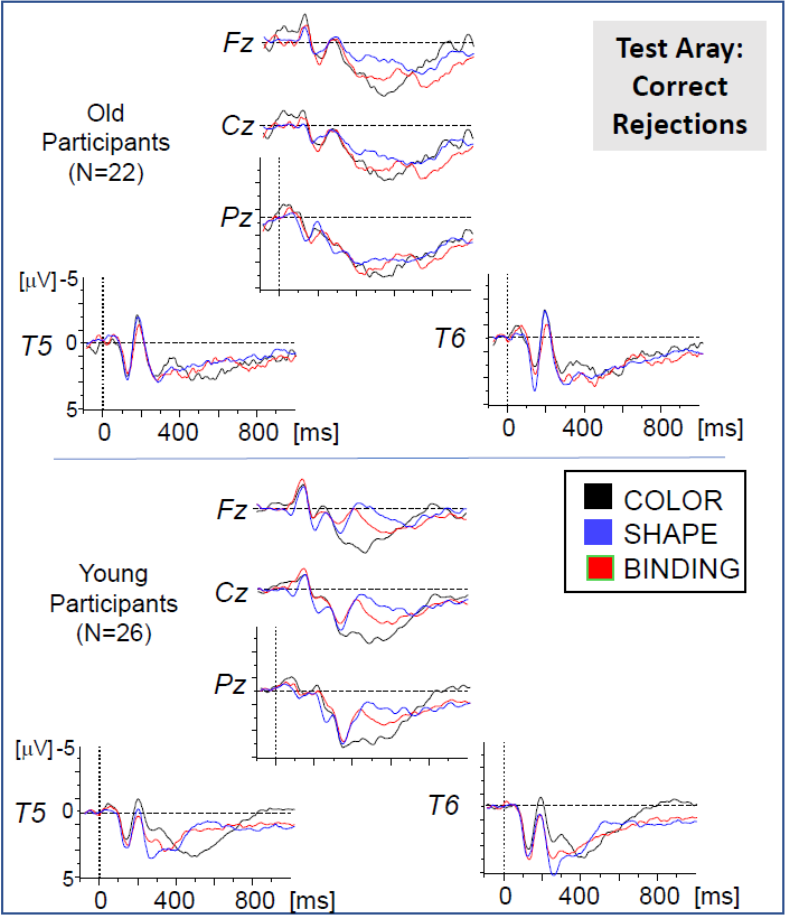

## Supplement: Analysis S1

### Peak analysis: N1 and P2

Coding of Condition

1=Color, 2=Shape, 3=Binding

#### N1 latency

| Group | Condition | Mean    | SD    |
|-------|-----------|---------|-------|
| young | 1         | 187,673 | 1,969 |
|       | 2         | 182,173 | 1,866 |
|       | 3         | 183,712 | 1,943 |
| old   | 1         | 191,545 | 2,140 |
|       | 2         | 188,432 | 2,028 |
|       | 3         | 190,545 | 2,112 |

#### N1 amplitude

| Group | Condition | Mean   | SD   |
|-------|-----------|--------|------|
| young | 1         | -3,272 | ,503 |
|       | 2         | -3,734 | ,478 |
|       | 3         | -2,938 | ,471 |
| old   | 1         | -3,711 | ,547 |

|   |        |      |
|---|--------|------|
| 2 | -4,414 | ,520 |
| 3 | -3,614 | ,512 |

### **P2 latency**

| Group | Condition | Mean    | SD    |
|-------|-----------|---------|-------|
| young | 1         | 235,615 | 2,119 |
|       | 2         | 237,519 | 2,248 |
|       | 3         | 234,788 | 2,398 |
| old   | 1         | 240,045 | 2,304 |
|       | 2         | 243,295 | 2,444 |
|       | 3         | 241,500 | 2,607 |

### **P2 amplitude**

| Group | Condition | Mean  | SD   |
|-------|-----------|-------|------|
| young | 1         | 5,767 | ,498 |
|       | 2         | 4,302 | ,532 |
|       | 3         | 5,015 | ,488 |
| old   | 1         | 2,324 | ,541 |
|       | 2         | 2,086 | ,578 |
|       | 3         | 2,571 | ,530 |

Results of the ANOVA (effects of 'condition' and 'condition x age') and subsequent post-hoc comparisons for the behavioral data (hit rate, A'). (B = Binding, C = feature-alone color, S = feature-alone shape).

| Variable              | Contrast | Factor Condition                         | Interaction Condition x Age               |
|-----------------------|----------|------------------------------------------|-------------------------------------------|
| <b>N1 (Latency)</b>   |          | F(2,92)=7.54, $p=.001$ , $\eta_p^2=.141$ | F(2,92)=.99, $p=.374$ , $\eta_p^2=.021$   |
|                       | post-hoc | B vs C                                   | F(1,46)=4.26, $p=.045$ , $\eta_p^2=.085$  |
|                       |          | B vs S                                   | F(1,46)=3.52, $p=.067$ , $\eta_p^2=.067$  |
|                       |          | C vs S                                   | F(1,46)=14.72, $p<.001$ , $\eta_p^2=.239$ |
| <b>N1 (Amplitude)</b> |          | F(2,92)=9.50, $p<.001$ , $\eta_p^2=.171$ | F(2,92)=0.26, $p=.768$ , $\eta_p^2=.006$  |
|                       | post-hoc | B vs C                                   | F(1,46)=1.43, $p=.238$ , $\eta_p^2=.030$  |
|                       |          | B vs S                                   | F(1,46)=14.46, $p<.001$ , $\eta_p^2=.239$ |
|                       |          | C vs S                                   | F(1,46)=10.74, $p=.002$ , $\eta_p^2=.186$ |
| <b>P2 (Latency)</b>   |          | F(2,92)=1.60, $p=.208$ , $\eta_p^2=.034$ | F(2,92)=.27, $p=.77$ , $\eta_p^2=.006$    |
|                       | post-hoc | B vs C                                   | n.a.                                      |
|                       |          | B vs S                                   | n.a.                                      |
|                       |          | C vs S                                   | n.a.                                      |

---

|                       |          |                                         |                                                |
|-----------------------|----------|-----------------------------------------|------------------------------------------------|
| <b>P2 (Amplitude)</b> |          | F(2,92)=5.86, p=.004, $\eta_p^2$ =.113  | F(2,92)=3.26, p=.043, $\eta_p^2$ =.066         |
|                       | B vs C   | F(1,46)=1.07, p=.306, $\eta_p^2$ =.023  | old: F(1,21)=.41, p=.530, $\eta_p^2$ =.019     |
|                       | post-hoc |                                         | young F(1,25)=6.03, p=.021, $\eta_p^2$ =.194   |
|                       | B vs S   | F(1,46)=4.92, p=.031, $\eta_p^2$ =.097  | old: F(1,21)=2.46, p=.132, $\eta_p^2$ =.105    |
|                       |          |                                         | young: F(1,25)=2.86, p=.103, $\eta_p^2$ =.103  |
|                       | C vs S   | F(1,46)=11.68, p=.001, $\eta_p^2$ =.199 | old: F(1,21)=.62, p=.440, $\eta_p^2$ =.029     |
|                       |          |                                         | young: F(1,25)=14.36, p=.001, $\eta_p^2$ =.365 |

---



## Supplement: Analysis S2

Statistical effects of the experimental factors age and block, and their interaction effect with the factor condition.

### Variable: Discrimination Ability (A')

| <i>Group</i> | <i>Block</i> | <i>Task</i>         | <i>Mean</i> | <i>SD</i>   |
|--------------|--------------|---------------------|-------------|-------------|
| <i>young</i> | 1            | <i>Color</i>        | ,985        | ,013        |
|              | 2            | <i>Color</i>        | ,987        | ,004        |
|              | 1            | <i>Shape</i>        | ,954        | ,016        |
|              | <b>2</b>     | <b><i>Shape</i></b> | <b>,983</b> | <b>,007</b> |
|              | 2            | <i>Binding</i>      | ,923        | ,020        |
|              | 2            | <i>Binding</i>      | ,949        | ,017        |
| <i>old</i>   | 1            | <i>Color</i>        | ,961        | ,014        |
|              | 2            | <i>Color</i>        | ,990        | ,004        |
|              | 1            | <i>Shape</i>        | ,863        | ,017        |
|              | 2            | <i>Shape</i>        | ,948        | ,008        |
|              | 2            | <i>Binding</i>      | ,739        | ,023        |
|              | 2            | <i>Binding</i>      | ,830        | ,019        |

**Variable: Mean N1 activity**

| Gruppe | Condition | Block | Mean   | SD    |
|--------|-----------|-------|--------|-------|
| young  | Color     | 1     | -2,280 | ,487  |
|        |           | 2     | -2,234 | ,489  |
|        | Shape     | 1     | -2,664 | ,532  |
|        |           | 2     | -2,446 | ,4575 |
|        | Binding   | 1     | -2,044 | ,446  |
|        |           | 2     | -1,612 | ,436  |
| old    | Color     | 1     | -2,741 | ,529  |
|        |           | 2     | -2,512 | ,531  |
|        | Shape     | 1     | -3,613 | ,578  |
|        |           | 2     | -3,142 | ,497  |
|        | Binding   | 1     | -2,511 | ,485  |
|        |           | 2     | -2,549 | ,474  |

**Variable: Mean P2 activity**

| Gruppe | Condition | Block | Mean  | SD   |
|--------|-----------|-------|-------|------|
| young  | Color     | 1     | 4,945 | ,552 |
|        |           | 2     | 5,067 | ,478 |
|        | Shape     | 1     | 2,991 | ,585 |
|        |           | 2     | 3,771 | ,558 |
|        | Binding   | 1     | 3,785 | ,593 |
|        |           | 2     | 4,169 | ,495 |
| old    | Color     | 1     | ,927  | ,600 |
|        |           | 2     | 1,478 | ,520 |
|        | Shape     | 1     | ,751  | ,636 |
|        |           | 2     | 1,242 | ,607 |
|        | Binding   | 1     | 1,035 | ,645 |
|        |           | 2     | 1,877 | ,538 |

**Variable: Mean LPC activity**

| Gruppe | Condition | Block | Mean  | SD   |
|--------|-----------|-------|-------|------|
| young  | Color     | 1     | 2,741 | ,467 |
|        |           | 2     | 2,455 | ,416 |
|        | Shape     | 1     | 2,951 | ,498 |
|        |           | 2     | 3,029 | ,390 |
|        | Binding   | 1     | 3,272 | ,459 |
|        |           | 2     | 3,324 | ,423 |
| old    | Color     | 1     | 1,305 | ,508 |
|        |           | 2     | 2,040 | ,452 |
|        | Shape     | 1     | ,592  | ,542 |
|        |           | 2     | 1,406 | ,424 |
|        | Binding   | 1     | 2,048 | ,499 |
|        |           | 2     | 2,825 | ,460 |

## Results of the ANOVA (F-Statistics=

| Variable  | Factor age                             | Factor Block                           | Interaction Block x Condition x Age   |
|-----------|----------------------------------------|----------------------------------------|---------------------------------------|
| <b>A'</b> | $F(1,46)=27.00, p<.001, \eta_p^2=.375$ | $F(1,46)=48.90, p<.001, \eta_p^2=.521$ | $F(2,92)=1.14, p=.325, \eta_p^2=.025$ |
| N1        | $F(1,46)=1.006, p=.321, \eta_p^2=.021$ | $F(1,46)=3.01, p=.086, \eta_p^2=.063$  | $F(2,92)=0.95, p=.392, \eta_p^2=.020$ |
| P2        | $F(1,46)=18.41, p<.001, \eta_p^2=.286$ | $F(1,46)=7.78, p=.008, \eta_p^2=.145$  | $F(2,92)=0.44, p=.640, \eta_p^2=.010$ |
| LPC       | $F(1,46)=5.50, p=.023, \eta_p^2=.107$  | $F(1,46)=4.72, p=.035, \eta_p^2=.093$  | $F(2,92)=0.09, p=.911, \eta_p^2=.002$ |

## Supplement: Table S2

Results of the ANOVA (effects of 'condition' and 'condition x age') and subsequent post-hoc comparisons for the behavioral data (hit rate, false alarms). (B = Binding, C = feature-alone color, S = feature-alone shape).

| Variable            | Contrast | Factor Condition                        | Interaction Condition x Age                                                                  |
|---------------------|----------|-----------------------------------------|----------------------------------------------------------------------------------------------|
| <b>Hit Rate</b>     |          | $F(2,92)=12.00, p<.001, \eta_p^2=.207$  | $F(2,92)=4.70, p=.012, \eta_p^2=.093$                                                        |
|                     | post-hoc | B vs C                                  | Old: $F(1,21)=17.66, p<.001, \eta_p^2=.457$<br>Young $F(1,25)=2.40, p=.341, \eta_p^2=.087$   |
|                     |          | B vs S                                  | Old: $F(1,21)=0.55, p=.465, \eta_p^2=.026$<br>Young $F(1,25)=.65, p=.654, \eta_p^2=.026$     |
|                     |          |                                         |                                                                                              |
| <b>False Alarms</b> |          | $F(2,92)=138.94, p<.001, \eta_p^2=.757$ | $F(2,92)=27.71, p<.001, \eta_p^2=.376$                                                       |
|                     | post-hoc | B vs C                                  | Old: $F(1,21)=128.39, p<.001, \eta_p^2=.859$<br>Young $F(1,25)=53.17, p<.001, \eta_p^2=.680$ |
|                     |          | B vs S                                  | Old: $F(1,21)=61.15, p<.001, \eta_p^2=.744$<br>Young $F(1,25)=34.69, p<.001, \eta_p^2=.581$  |
|                     |          |                                         |                                                                                              |

## Supplement: Table S3

Comparison of experimental setups used in studies on age-specific binding capacity

| Study                                | sample (young)                                    | sample (old)                                     | Type: task              |
|--------------------------------------|---------------------------------------------------|--------------------------------------------------|-------------------------|
| Reference: see Text                  |                                                   |                                                  |                         |
| <b>Niedeggen et al.</b>              | N=26 (mean age 23.8)                              | N=22 (mean age 68.8)                             | change detection        |
| <b>Brockmole et al., (2008)</b>      |                                                   |                                                  |                         |
| <i>Experiment 2</i>                  | N=12 (mean age 21.5)                              | N=12 (mean age 67.3)                             | change detection        |
| <b>Isella et al., 2015</b>           | N=25 (mean age 24.8)                              | N=26 (mean age 73.2)                             | change detection        |
| <b>Parra et al., 2009</b>            | N=14 (mean age 20.7)                              | N=14 (mean age 65.9)                             | change detection        |
|                                      | N=32 (mean age 25.2) and<br>N=53 (mean age 35.2)  | N=35 (mean age 49.2) and<br>N=35 (mean age 67.5) | item recognition        |
| <b>Pertzow et al., 2015</b>          |                                                   |                                                  |                         |
| <b>Brown &amp; Brockmole, 2010</b>   |                                                   |                                                  |                         |
| <i>Experiment 1</i>                  | N=24 (mean age 18.9)                              | N=24 (mean age 72.2)                             | single item recognition |
| <i>Experiment 2</i>                  | N=24 (mean age 20.3)                              | N=24 (mean age 72.3)                             | single item recognition |
| <b>Chalfonte &amp; Johnson, 1996</b> |                                                   |                                                  |                         |
| <i>Experiment 1b</i>                 | N=32 (mean age 19.1)                              | N=32 (mean age 69.5)                             | item recognition        |
| <i>Experiment 2</i>                  | N=32 (mean age 19.4)                              | N=32 (mean age 71.0)                             | item recognition        |
| <i>Experiment 3b</i>                 | N=32 (mean age 19.9)                              | N=32 (mean age 71.9)                             | item recognition        |
| <b>Cowan et al., 2006</b>            |                                                   |                                                  |                         |
| <i>Experiment 1a</i>                 | N=53 (mean age 20.4)                              | N=33 (mean age 71.1)                             | change detection        |
| <i>Experiment 2a</i>                 | N=24 (mean age 18.9)                              | N=32 (mean age 71.4)                             | change detection        |
| <b>Mitchel et al., 2000</b>          |                                                   |                                                  |                         |
| <i>Experiment 1</i>                  | N=24 (mean age 19.5)                              | N=24 (mean age 74.1)                             | change detection        |
| <i>Experiment 2</i>                  | N=16 (mean age 19.6)                              | N=16 (mean age 75.1)                             | change detection        |
| <b>Rhodes et al., 2017</b>           |                                                   |                                                  |                         |
| <i>Experiment 1</i>                  | N=24 (mean age 20.7) and<br>N= 24 (mean age 21.1) | N=24 (mean age 70.9)<br>and N=25 (mean age 70.2) | change detection        |
| <i>Experiment 2</i>                  | N=24 (mean age 20.7) and<br>N= 24 (mean age 21.1) | N=25 (mean age 70.0) and<br>N=24 (mean age 71.4) | change detection        |
| <b>Brown et al., 2016</b>            |                                                   |                                                  |                         |
| <i>Experiment 1</i>                  | N=24 (mean age 19.9)                              | N=24 (mean age 76.0)                             | single item recognition |
| <i>Experiment 2</i>                  | N=24 (mean age 22.1)                              | N=24 (mean age 77.6)                             | single item recognition |
| <i>Experiment 3</i>                  | N=24 (mean age 20.5)                              | N=24 (mean age 75.4)                             | single item recognition |
| <b>van Geldorb et al., 2014</b>      | N=31 (mean age 22.3)                              | N= 30 (mean age 54.8 and<br>N=30 (mean age 70.2) | item recall             |

## Supplement 6

Comparison of experimental setups used in studies on age-specific binding capacity

| Study                                | Type: Feature binding                                           | Number of Items | Presentation time: study array | Maintenance time  |
|--------------------------------------|-----------------------------------------------------------------|-----------------|--------------------------------|-------------------|
| Reference: see Text                  |                                                                 |                 |                                |                   |
| <b>Niedeggen et al.</b>              | intrinsic intra-item (color/shape)                              | 3               | 2000 ms                        | 900 ms            |
| <b>Brockmole et al., (2008)</b>      |                                                                 |                 |                                |                   |
| <i>Experiment 2</i>                  | intrinsic intra-item (color/shape)                              | 4               | 1000 ms                        | 900 ms            |
| <b>Isella et al., 2015</b>           | intrinsic intra-item (color/shape)                              | 4               | 4000ms                         | 1000ms            |
| <b>Parra et al., 2009</b>            | intrinsic intra-item (color/color)                              | 3 and 4         | 2000ms and 1000ms              | 900ms             |
| <b>Pertzow et al., 2015</b>          | extrinsic intra-item (object/location)                          | 1 and 3         | 1000ms and 3000ms              | 1000ms and 4000ms |
| <b>Brown &amp; Brockmole, 2010</b>   |                                                                 |                 |                                |                   |
| <i>Experiment 1</i>                  | intrinsic intra-item (color/shape)                              | 3               | 900ms                          | 1000ms            |
| <i>Experiment 2</i>                  | intrinsic intra-item (color/shape)                              | 3               | 1500ms                         | 1000ms            |
| <b>Chalfonte &amp; Johnson, 1996</b> | intrinsic (color/object) and extrinsic (object/location)        | 30              | 90sec                          | immediate         |
| <i>Experiment 1b</i>                 |                                                                 |                 |                                |                   |
| <i>Experiment 2</i>                  | intrinsic (color/object)                                        | 30              | 90sec                          | immediate         |
| <i>Experiment 3b</i>                 | intrinsic (color/object)                                        | 30              | 90sec                          | immediate         |
| <b>Cowan et al., 2006</b>            |                                                                 |                 |                                |                   |
| <i>Experiment 1a</i>                 | extrinsic intra-item (object/location)                          | 4-10            | 250ms                          | immediate         |
| <i>Experiment 2a</i>                 | extrinsic intra-item (object/location)                          | 4-10            | 250ms                          | immediate         |
| <b>Mitchel et al., 2000</b>          |                                                                 |                 |                                |                   |
| <i>Experiment 1</i>                  | extrinsic intra-item (object/location)                          | 9               | 1000ms per Item                | 8000ms            |
| <i>Experiment 2</i>                  | extrinsic intra-item (object/location)                          | 9               | 1000ms per Item                | 8000ms            |
| <b>Rhodes et al., 2017</b>           |                                                                 |                 |                                |                   |
| <i>Experiment 1</i>                  | intrinsic (color/shape)                                         | 9               | 900ms                          | 1000ms            |
| <i>Experiment 2</i>                  | extrinsic intra-item (object/location)                          | 9               | 900ms                          | 1000ms            |
| <b>Brown et al., 2016</b>            |                                                                 |                 |                                |                   |
| <i>Experiment 1</i>                  | intrinsic intra-item (color/shape)                              | 3               | 900ms and 1500ms               | 1000ms            |
| <i>Experiment 2</i>                  | intrinsic intra-item (color/shape)                              | 3               | 1500ms                         | 1000ms            |
| <i>Experiment 3</i>                  | intrinsic intra-item (color/shape)                              | 3               | 900ms                          | 1000ms            |
| <b>van Geldorb et al., 2014</b>      | intrinsic intra-item (color/shape) and relational (color/shape) | 4               | 4000ms                         | 1000ms            |



## Supplement 6

Comparison of experimental setups used in studies on age-specific binding capacity

| Study                                | Performance: variable                     | Contrasts                                                                                        | Age-specific effect |
|--------------------------------------|-------------------------------------------|--------------------------------------------------------------------------------------------------|---------------------|
| Reference: see Text                  | A' and d' refer to discrimination ability | Comparison of experimental conditions reported in the study                                      |                     |
| <b>Niedeggen et al.</b>              | A' and hit rate                           | Binding<Color and Binding<Shape                                                                  | yes                 |
| <b>Brockmole et al., (2008)</b>      |                                           |                                                                                                  |                     |
| <i>Experiment 2</i>                  | not specified (A' or proportion correct)  | Binding=Shape<Color                                                                              | no                  |
| <b>Isella et al., 2015</b>           | A'                                        | Binding<Color; Color=Shape; Shape=Binding                                                        | no                  |
|                                      |                                           | Binding=Non-Conjunctive Colors<Colors and Binding<Non-Conjunctive Colors<Colors                  | no                  |
| <b>Parra et al., 2009</b>            | A'                                        |                                                                                                  |                     |
| <b>Pertzow et al., 2015</b>          | swap errors                               | Between Age Groups                                                                               | no                  |
| <b>Brown &amp; Brockmole, 2010</b>   |                                           |                                                                                                  |                     |
| <i>Experiment 1</i>                  | A'                                        | Shape<Color; Binding=Shape                                                                       | no                  |
| <i>Experiment 2</i>                  | A'                                        | Binding<Shape<Color                                                                              | yes                 |
| <b>Chalfonte &amp; Johnson, 1996</b> |                                           |                                                                                                  |                     |
| <i>Experiment 1b</i>                 | A'                                        | Intrinsic vs. Extrinsic Binding                                                                  | yes                 |
| <i>Experiment 2</i>                  | A'                                        | Binding<Item and Binding<Color                                                                   | yes                 |
| <i>Experiment 3b</i>                 | A'                                        | Incidental vs. Intentional Learning of Bound Objects                                             | yes                 |
| <b>Cowan et al., 2006</b>            |                                           |                                                                                                  | yes                 |
| <i>Experiment 1a</i>                 | d'                                        | Binding Change<Item Change                                                                       | yes                 |
| <i>Experiment 2a</i>                 | d'                                        | Binding Change<Item change                                                                       | yes                 |
| <b>Mitchel et al., 2000</b>          |                                           |                                                                                                  |                     |
| <i>Experiment 1</i>                  | d'                                        | Binding<Single Feature (Object/Location)                                                         | yes                 |
| <i>Experiment 2</i>                  | d'                                        | Binding<Single Feature (Object/Location)                                                         | yes                 |
| <b>Rhodes et al., 2017</b>           |                                           |                                                                                                  |                     |
| <i>Experiment 1</i>                  | Corrected recognition $P_r$               | Binding<Color and Binding=Shape                                                                  | no                  |
| <i>Experiment 2</i>                  | Corrected recognition $P_r$               | Binding=Color=Location                                                                           | no                  |
| <b>Brown et al., 2016</b>            |                                           |                                                                                                  |                     |
| <i>Experiment 1</i>                  | A'                                        | Binding=Shape<Color (different retention times)                                                  | no                  |
| <i>Experiment 2</i>                  | A'                                        | Binding=Shape<Color (sequential presentation)                                                    | no                  |
| <i>Experiment 3</i>                  | A'                                        | Binding<Shape<Color (suffix interference)                                                        | yes                 |
| <b>van Geldorb et al., 2014</b>      | number correct                            | relational<conjunctive binding<br>interference<non-interference (stronger in relational binding) | yes                 |
